# Supplementary material
Source: Springer Nature journal article supplement (https://www.springermedizin.de/resource/supplementary/12889_2013_6020_MOESM2_ESM.pdf/9494160)
Supplement: MOESM2 [file 9494160]

### Practice block 1

### Trial block 1

### Trial block 2

E  
Neutral

I  
Annoying

\*

E  
Neutral  
Chlamydia Screening

I  
Annoying

\*

E  
Neutral

I  
Annoying  
Chlamydia Screening

\*

E

I

E

I

E

I
